# Supplementary material for: Nisin-Loaded Ulvan Particles: Preparation and Characterization
Source: MDPI journal article supplement (doi:10.3390/foods10051007), 2021-05-04
Supplement: s1 [file s1]

## Supplementary Materials

### Nisin-loaded ulvan particles: preparation and characterization

Ruta Gruskiene <sup>1</sup>, Tatjana Kavleiskaja <sup>2</sup>, Ramune Staneviciene <sup>3</sup>, Stefanos Kikionis <sup>4</sup>, Efstathia Ioannou <sup>4</sup>,  
Elena Serviene <sup>1,3</sup>, Vassilios Roussis <sup>4</sup> and Jolanta Sereikaite <sup>1,\*</sup>

<sup>1</sup> Department of Chemistry and Bioengineering, Vilnius Gediminas Technical University, 10221 Vilnius, Lithuania; ruta.gruskiene@vgtu.lt (R.G.); serviene@gmail.com (E.S.)

<sup>2</sup> Institute of Chemistry, Vilnius University, 01513 Vilnius, Lithuania; tania.krivorot81@gmail.com

<sup>3</sup> Laboratory of Genetics, Institute of Botany, Nature Research Centre, 08412 Vilnius, Lithuania; ramune.staneviciene@gamtc.lt

<sup>4</sup> Section of Pharmacognosy and Chemistry of Natural Products, Department of Pharmacy, National and Kapodistrian University of Athens, Panepistimiopolis Zografou, 15771 Athens, Greece; skikionis@pharm.uoa.gr (S.K.); eioannou@pharm.uoa.gr (E.I.); roussis@pharm.uoa.gr (V.R.)

\* Correspondence: jolanta.sereikaite@vgtu.lt

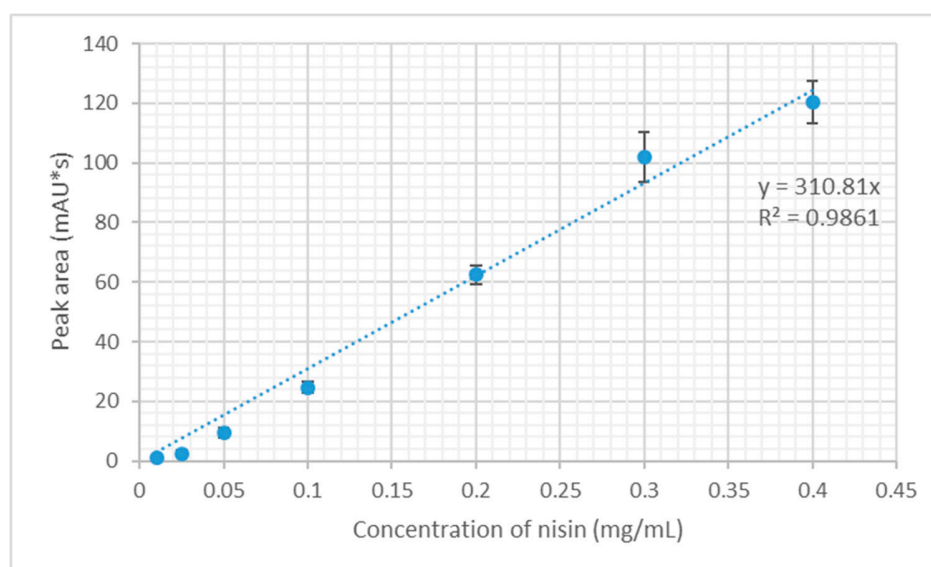

**Figure S1.** Calibration curve for nisin determination.

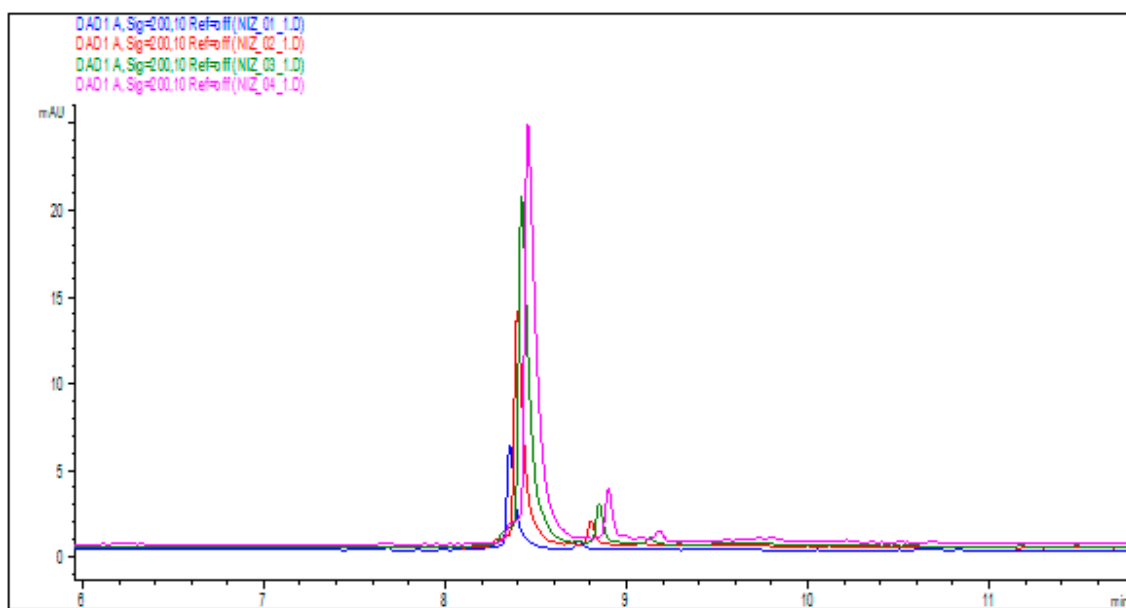

**Figure S2.** Capillary electropherograms of nisin at different concentrations (0.1-0.4 mg/mL).
